# Supplementary material for: Treading carefully: a qualitative ethnographic study of the clinical, social and educational uses of exercise ECG in evaluating stable chest pain
Source: PubMed Central journal article supplement — BMJ Open. 2012 Feb 8;2(1):e000508. doi: 10.1136/bmjopen-2011-000508 (PMC3277903; doi:10.1136/bmjopen-2011-000508), 2012-02-08
Supplement: bmjopen-2011-000508-s1.pdf [file bmjopen-2011-000508-s1.pdf]

**\*\*Please note there is no reporting checklist relevant to this study type\*\***
